# Supplementary material for: A synergistic CoFe 2 O 4 spinel–cobalt phthalocyanine–carbon nanotube hybrid catalyst for highly selective electrochemical nitrate-to-ammonia conversion
Source: Royal Society of Chemistry journal article supplement (doi:10.1039/d5dt02152a), 2025-12-16
Supplement: d5dt02152a1.pdf [file d5dt02152a1.pdf]

## Supporting Information

*Synergistic CoFe<sub>2</sub>O<sub>4</sub> Spinel–Cobalt Phthalocyanine–Carbon Nanotube Hybrid Catalyst for Highly Selective Electrochemical Nitrate-to-Ammonia Conversion*

Ningma Dorzi Sherpa,<sup>a</sup> Hiren Jungi,<sup>b</sup> Shakil Ahammad Chowdhury,<sup>c</sup> Hiranmay Barma<sup>a</sup> and  
Dr. Nitish Roy<sup>a,\*</sup>

---

\* Corresponding author

<sup>a</sup>Laboratory for Sustainable Energy Conversion, Department of Chemistry, University of North Bengal, Raja Rammohunpur, Darjeeling, West Bengal-734013

<sup>b</sup> Inorganic Materials And Catalysis Division, CSIR-Central Salt & Marine Chemicals Research Institute, Gijubhai Badheka Marg, Bhavnagar, Gujarat-364002, India

<sup>c</sup>Materials Science Centre, Indian Institute of Technology Kharagpur, W. B.-721302, India

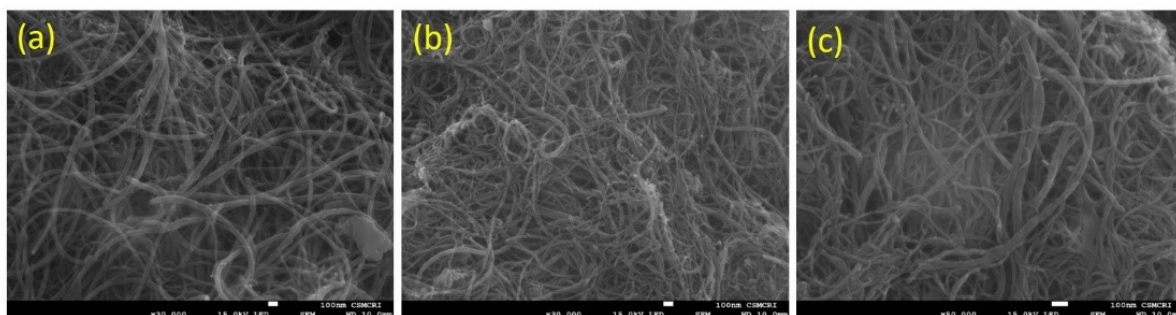

**Figure S1.** FESEM images of the different  $\text{CoFe}_2\text{O}_4/\text{CoPc}/\text{CNT}$  samples prepared by varying  $(\text{Co}(\text{NO}_3)_2 \cdot 6\text{H}_2\text{O} : \text{FeSO}_4 \cdot 7\text{H}_2\text{O})$  (a)  $\text{Co}:\text{Fe} = 1:1$ , (b)  $\text{Co}:\text{Fe} = 1:0.5$  and (c)  $\text{Co}:\text{Fe} = 1:0.25$  keeping other reaction parameters constant.

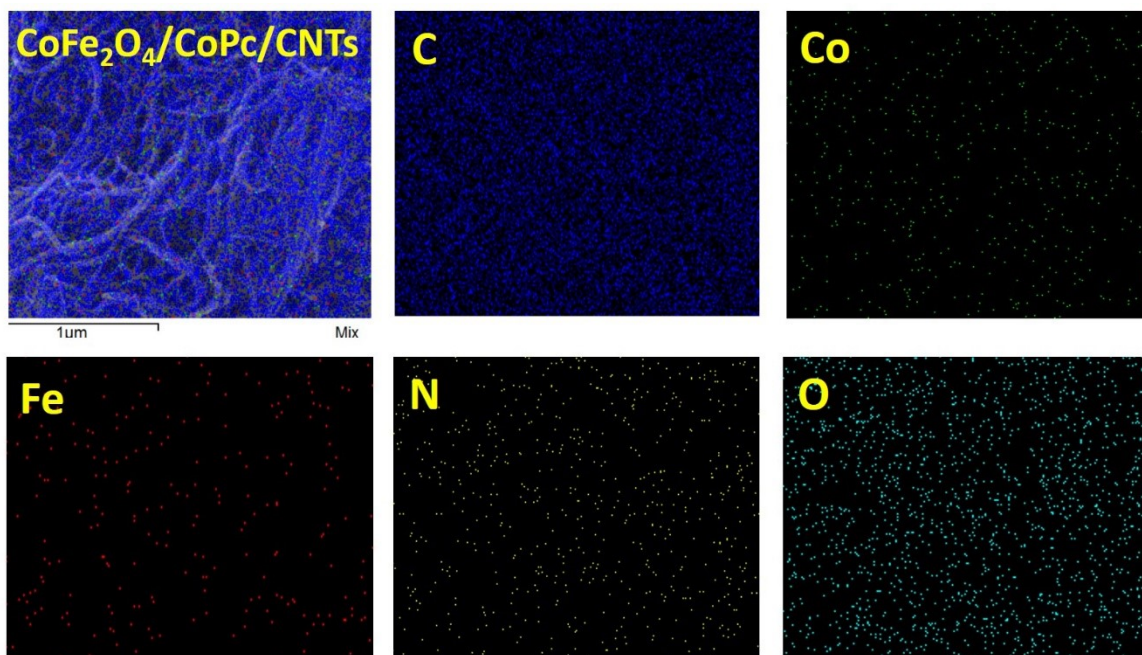

**Figure S2.** Elemental mappings of the  $\text{CoFe}_2\text{O}_4/\text{CoPc}/\text{CNT}$  samples prepared by using 1 mmole  $(\text{Co}(\text{NO}_3)_2 \cdot 6\text{H}_2\text{O})$  and 0.125 mmole  $\text{FeSO}_4 \cdot 7\text{H}_2\text{O}$  keeping other reaction parameters constant. Insets display the overlapped elements or the individual element as mentioned.

**Table S1:** Table of weight loss (%) during TGA for the different samples

| (Molar ratio) | Initial Weight loss (%) | Weight loss due of CoPc at first segment (%) | Weight loss due of CoPc at Second segment (%) | Weight loss due to CoPc (%) |
|---------------|-------------------------|----------------------------------------------|-----------------------------------------------|-----------------------------|
| Co:Fe=1:0.125 | 4.7                     | 7.5                                          | 4.4                                           | 12.48                       |
| Co:Fe=1:0.25  | 2.3                     | 5.7                                          | 3.3                                           | 9.21                        |
| Co:Fe=1:0.5   | 1.9                     | 2.7                                          | 5.4                                           | 8.26                        |
| Co:Fe=1:1     | 10.4                    | 12.4                                         | 2.9                                           | 17.1                        |

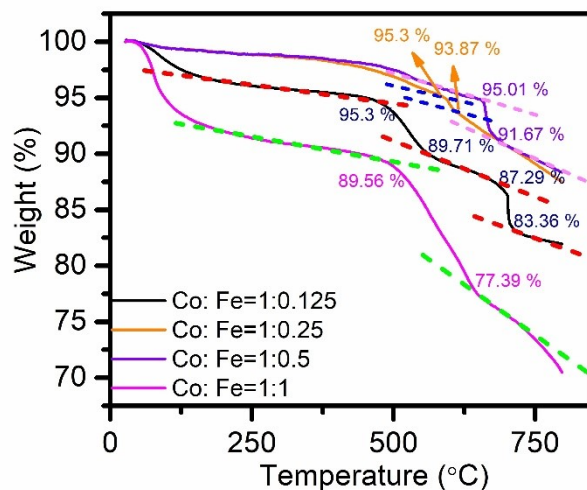

**Figure S3.** TGA plots of the catalyst,  $\text{CoFe}_2\text{O}_4/\text{CoPc}/\text{CNT}$  synthesised using different molar ratio (Co:Fe=1:1, 1:0.5, 1:0.25 and 1:0.125)

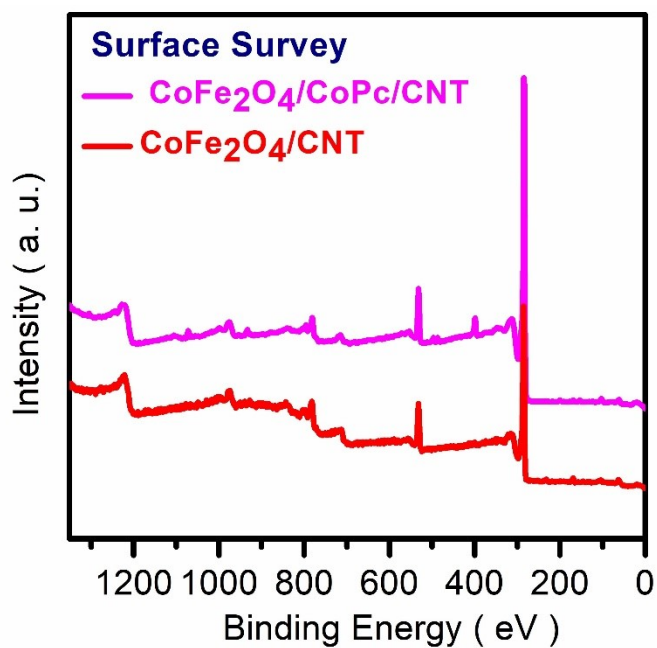

**Figure S4.** XPS survey spectrum of  $\text{CoFe}_2\text{O}_4/\text{CoPc}/\text{CNT}$  and  $\text{CoFe}_2\text{O}_4/\text{CNT}$  synthesized using 1 mmole  $\text{Co}(\text{NO}_3)_2 \cdot 6\text{H}_2\text{O}$  and 0.125 mmole  $\text{FeSO}_4 \cdot 7\text{H}_2\text{O}$  with and without  $\text{H}_2\text{Pc}$  keeping other reaction parameters fixed.

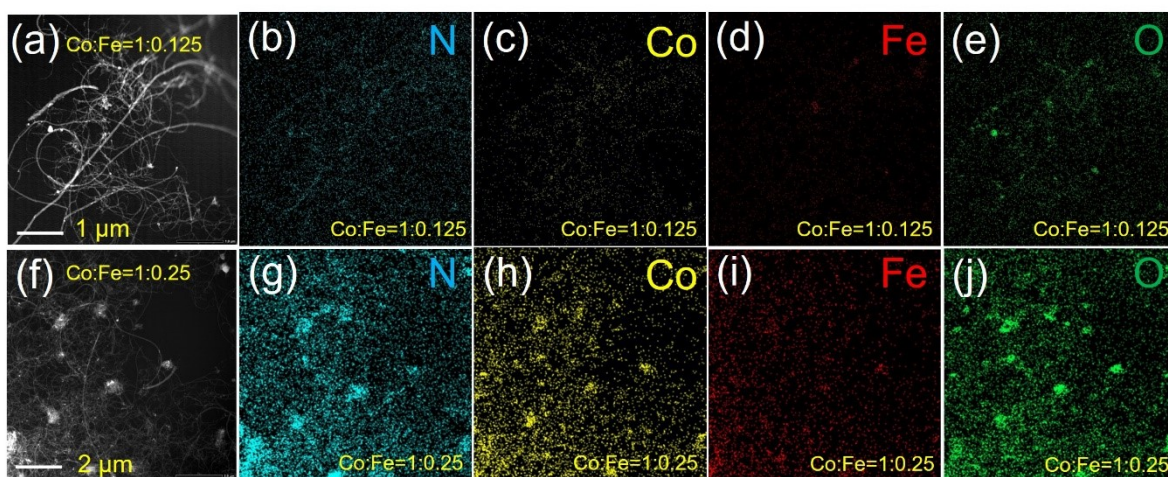

**Figure S5.** STEM image and corresponding EDS elemental mapping of different elements obtained from samples  $\text{CoFe}_2\text{O}_4/\text{CoPc}/\text{CNT}$  synthesized using  $\text{Co}:\text{Fe} = 1:0.125$  and  $\text{Co}:\text{Fe} = 1:0.25$ , respectively.

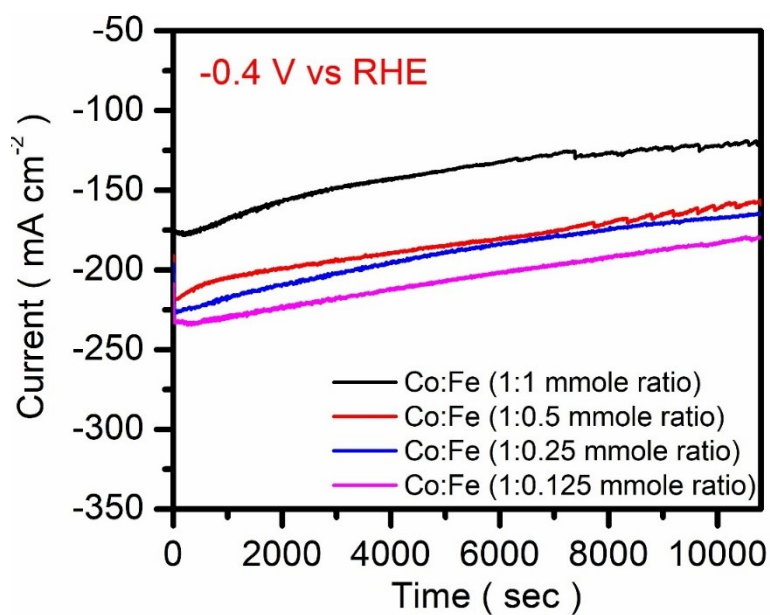

**Figure S6.** Chronoamperometry plots of the different  $\text{CoFe}_2\text{O}_4/\text{CoPc}/\text{CNT}$  samples prepared by varying  $(\text{Co}(\text{NO}_3)_2 \cdot 6\text{H}_2\text{O} (1 \text{ mmole}): \text{FeSO}_4 \cdot 7\text{H}_2\text{O} (1 \text{ to } 0.125 \text{ mmole})$  mole ratio as mentioned keeping other reaction parameters constant) at  $-0.4 \text{ V vs RHE}$  for 3 h.

**Table S2:** Table of the  $R_s$ ,  $R_p$  and CPE of different samples synthesised using different molar ratio (Co:Fe=1:1, 1:0.5, 1:0.25 and 1:0.125)

| (Molar ratio) | $R_s$ ( $\Omega$ ) | $R_p$ ( $\Omega$ ) | CPE ( $\Omega$ ) |
|---------------|--------------------|--------------------|------------------|
| Co:Fe=1:1     | 22.8               | 23.1               | 12.2             |
| Co:Fe=1:0.5   | 19.6               | 9.78               | 8.69             |
| Co:Fe=1:0.25  | 19.3               | 7.27               | 6.38             |
| Co:Fe=1:0.125 | 14.1               | 7.16               | 3.24             |

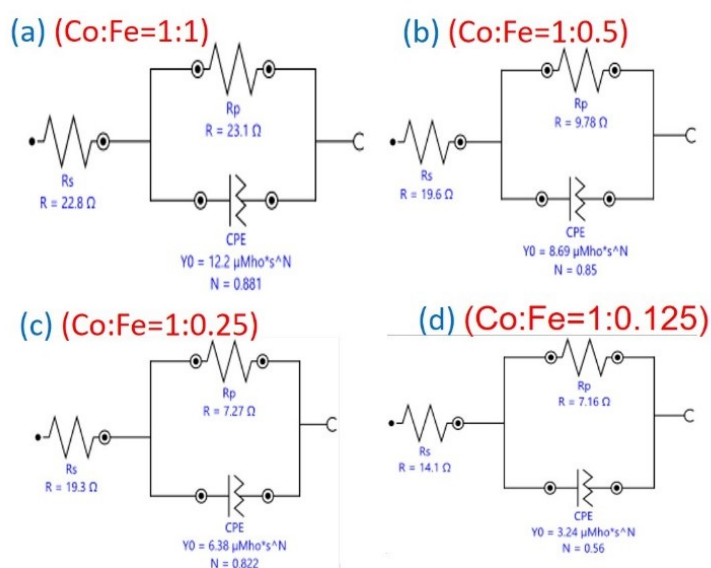

**Figure S7.** (a-d) Equivalent Circuit diagram of the catalyst,  $\text{CoFe}_2\text{O}_4/\text{CoPc}/\text{CNT}$  synthesised using the molar ratio Co:Fe=1:1, 1:0.5, 1:0.25 and 1:0.125.



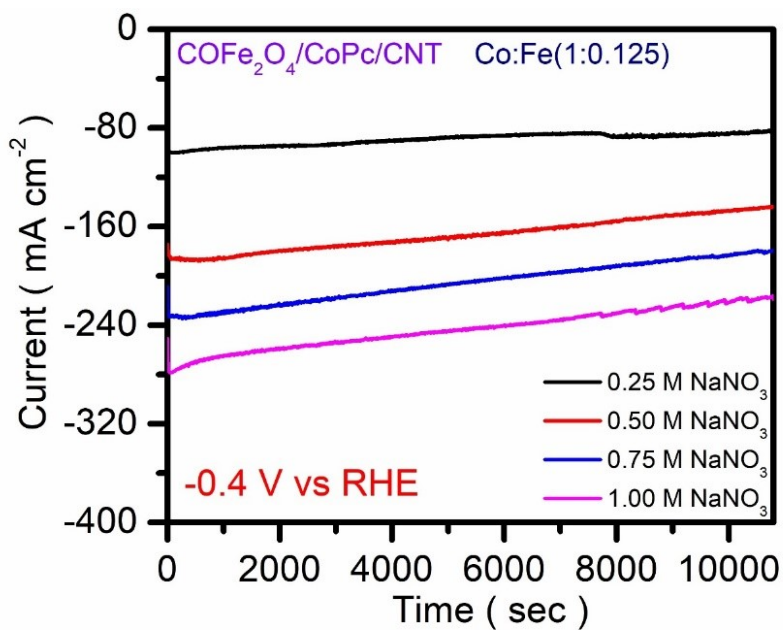

**Figure S8.** Chronoamperometry plots of the optimized  $\text{CoFe}_2\text{O}_4/\text{CoPc}/\text{CNT}$  catalyst variation performed using various  $\text{NaNO}_3$  concentration at  $-0.4 \text{ V vs RHE}$  for 3 h.

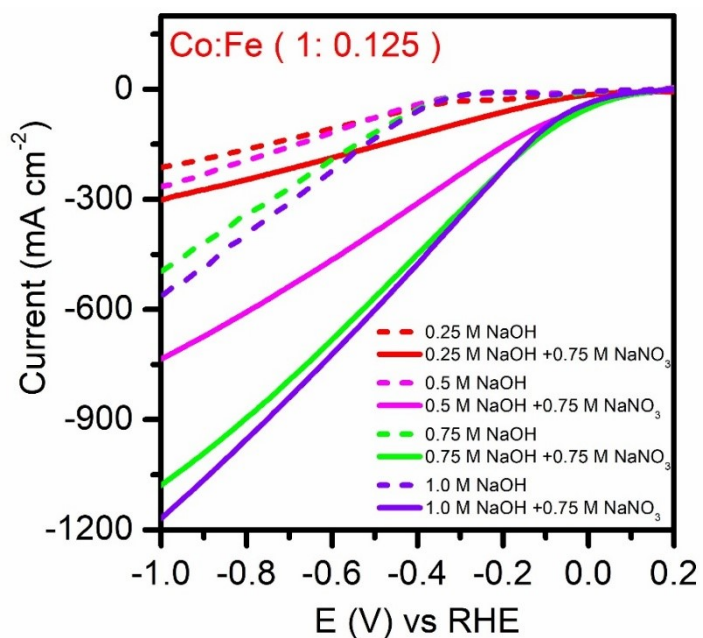

**Figure S9.** LSVs plots of the optimized catalyst,  $\text{CoFe}_2\text{O}_4/\text{CoPc}/\text{CNT}$  with molar ratio (Co:Fe=1:0.125) in different electrolyte concentration (0.25 M, 0.5 M, 0.75 M and 1.0 M) NaOH.

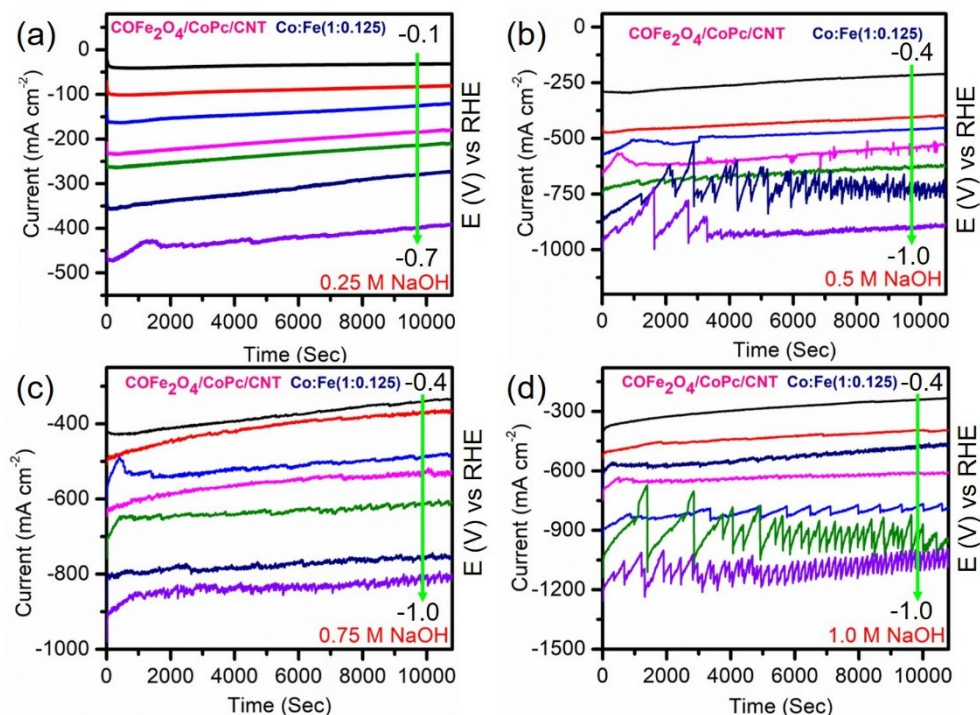

**Figure S10.** (a-d) Chronoamperometry plots of the optimized  $\text{CoFe}_2\text{O}_4/\text{CoPc}/\text{CNT}$  catalyst at different cathodic potential (V vs RHE) by varying the electrolyte concentration (0.25 M, 0.5 M, 0.75 M and 1.0 M) NaOH.

### Detection of $\text{NH}_3$

To quantify  $\text{NH}_3$  produced during the electrochemical nitrate reduction, the electrolyte collected after chronoamperometric measurements was diluted 20-fold. The indophenol blue method was employed for  $\text{NH}_3$  determination. Specifically, 1 mL of the diluted electrolyte was mixed with 17 mL of distilled water, 0.5 mL of phenolic solution (5% phenol in ethanol), 0.5 mL of 0.1 M sodium nitroprusside [ $\text{Na}_2[\text{Fe}(\text{CN})_5\text{NO}]$ ], and 1 mL of NaClO solution (prepared using a 4:1 molar ratio of alkaline solution to NaClO). The mixture was kept in the dark for 30 minutes to allow the formation of an intense blue color. The resulting solution was further diluted 10-fold, and its absorbance was recorded at 655 nm. Calibration was performed with standard  $\text{NH}_4\text{Cl}$  solutions as shown in Figure S6, which showed good linearity. The absorbance



at 655 nm was then used to quantify the  $\text{NH}_3$  concentration in the electrolyte after chronoamperometric studies.

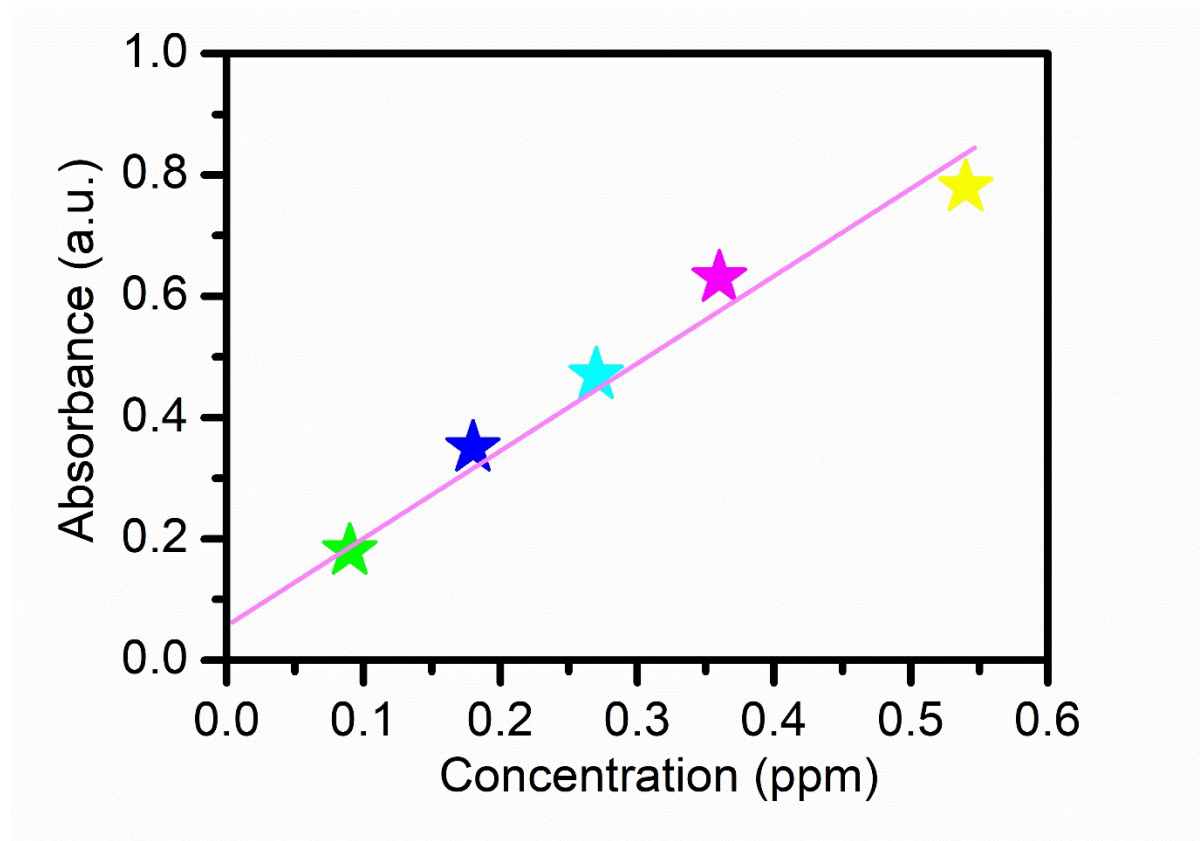

**Figure S11.** Linear relationship of absorbance of the Indo-phenol complex with  $\text{NH}_3$  concentration at 655 nm.

### Determination of $\text{NO}_2^-$

To quantify nitrite ( $\text{NO}_2^-$ ) as a by-product during the electrochemical nitrate reduction, the electrolyte collected after chronoamperometric measurements was diluted 50-fold. Nitrite concentration was determined using the Griess test combined with UV–Vis spectroscopy. The Griess reagent was prepared by dissolving 0.1 g of N-(1-naphthyl)ethylenediamine dihydrochloride, 1.0 g of sulfanilamide, and 2.94 mL of  $\text{H}_3\text{PO}_4$  in 50 mL of deionized water. For the measurement, 1 mL of the diluted electrolyte was mixed with 1 mL of Griess reagent and 2 mL of deionized water at room temperature, and the mixture was allowed to stand for 20 minutes to develop a pink color. The absorbance was recorded at 540 nm and compared with reference standards to determine the nitrite concentration. Calibration plot is shown in Figure S7.

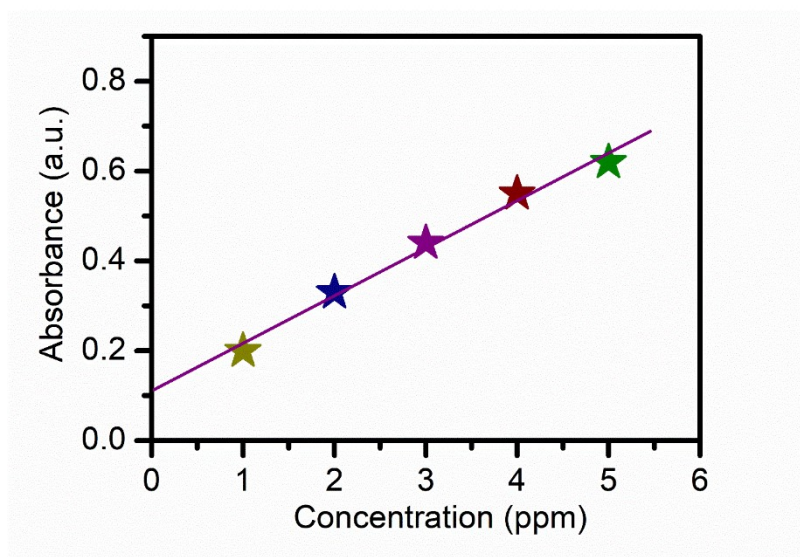

**Figure S12.** Linear relationship of absorbance of the azo dye complex with nitrite concentration at 540 nm.

### Calculation of the FE for $\text{NH}_3$

$$\text{Faradaic Efficiency \%} = \frac{\text{Ammonia produced per total charge passed}}{\text{Total charge passed}} \times 100\%$$

$$\text{Faradaic Efficiency \%} = (8 \times [\text{NH}_3] \times V \times N_A) \times 100 \% / (M_{\text{NH}_3} \times A \times t \times C)$$

$$\text{Yield of } \text{NH}_3 = (8 \times [\text{NH}_3]) \times V / (M_{\text{NH}_3}).$$

Where,  $[\text{NH}_3]$  is concentration of ammonia,  $V$  is volume of electrolyte solution,  $N_A$  is Avogadro number,  $M_{\text{NH}_3}$  is molar mass of ammonia,  $A$  is current,  $t$  is total time of electrolysis and  $C$  is coulomb.

### Calculation of FE for Nitrite

$$\text{Faradaic Efficiency \%} = \frac{\text{Nitrite produced per total charge passed}}{\text{Total charge passed}} \times 100\%$$

$$\text{Faradaic Efficiency \%} = (2 \times [\text{NO}_2^-] \times V \times N_A) \times 100 \% / (M_{\text{NaNO}_2} \times A \times t \times C)$$

$$\text{Yield of } \text{NO}_2^- = (2 \times [\text{NO}_2^-] \times V) / (M_{\text{NaNO}_2}).$$

Where  $[\text{NO}_2^-]$  is the concentration of nitrite
